# Supplementary material
Source: publisher site journal article supplement (https://www.spandidos-publications.com/5006/downloadSupplementary)
Supplement: Supplementary file 1 [file downloadSupplementary]

## Sheet: Table SV
Table SV. The correlation between DPY30 and immune cells.
Core gene	Immune cells	Spearman's coefficient	P-value
DPY30	Mast cells	-0.367	<0.001
DPY30	Tem	-0.378	<0.001
DPY30	Eosinophils	-0.331	<0.001
DPY30	Neutrophils	-0.291	<0.001
DPY30	Tcm	-0.279	<0.001
DPY30	DC	-0.266	<0.001
DPY30	B cells	-0.246	0.002
DPY30	T cells	-0.261	<0.001
DPY30	Th17 cells	-0.190	0.015
DPY30	TFH	-0.250	0.001
DPY30	iDC	-0.244	0.002
DPY30	pDC	-0.221	0.005
DPY30	Macrophages	-0.237	0.002
DPY30	TReg	-0.197	0.012
DPY30	aDC	-0.167	0.034
DPY30	Th1 cells	-0.180	0.022
DPY30	T helper cells	-0.155	0.049
DPY30	Cytotoxic cells	-0.121	0.124
DPY30	CD8 T cells	-0.125	0.114
DPY30	NK CD56dim cells	-0.145	0.066
DPY30	Th2 cells	0.067	0.396
DPY30	NK CD56bright cells	0.058	0.459
DPY30	NK cells	-0.066	0.404
DPY30	Tgd	0.036	0.648
Tem, effector memory T cell; Tcm, central memory T cell; DC, dendritic cell; Th1/2/17 cells, T helper 1/2/17 cells; TFH, T follicular helper cells; iDC, immature dendritic cells; pDC, plasmacytoid dendritic cells; Treg cells, regulatory T cells; aDC, activated dendritic cells; NK cells, natural killer cells; Tgd, γδ T cells.
